# Supplementary material
Source: publisher site journal article supplement (http://jamanetwork.com/pdfaccess.ashx?url=/data/journals/psych/28903/yoa120032_supp.pdf)
Supplement: Supplementary file 1 [file yoa120032_supp.pdf]

## Supplementary Online Content

Olfson M, Blanco C, Liu SM, Wang S, Correll CU. National trends in the office-based treatment of children, adolescents, and adults with antipsychotics. *Arch Gen Psychiatry*. Published online August 6, 2012. doi:10.1001/archgenpsychiatry.2012.647.

**eTable.** Broad and Narrow Diagnostic Groups and *ICD-9-CM* Codes.

This supplementary material has been provided by the authors to give readers additional information about their work.

| eTable: Broad and Narrow Diagnostic Groups and ICD-9-CM Codes                                                                                   |                                                                                                                                                                                                                                                            |
|-------------------------------------------------------------------------------------------------------------------------------------------------|------------------------------------------------------------------------------------------------------------------------------------------------------------------------------------------------------------------------------------------------------------|
| <i>Broad Diagnostic Group</i>                                                                                                                   | <i>ICD-9-Codes</i>                                                                                                                                                                                                                                         |
| Mood Disorders                                                                                                                                  | 296.82, 301.12, 313.10-313.19, 296.2-296.23, 296.25-296.33, 296.34-296.39, 296.9, 300.4, 301.1, 311.0-311.9, 296.0-296.1, 296.4-296.81, 296.89, 301.11, 301.13                                                                                             |
| Anxiety Disorders                                                                                                                               | 293.84, 300.00-300.02, 300.09, 300.2, 300.21-300.23, 300.29, 300.3, 300.7, 308.0-308.9, 309.21, 309.81, 312.39, 313.0, 313.21, or 313.23), and psychotic (290.0-295.9, 296.24, 296.34, 297.0-298.0, 298.3-299.9 [except 299.0-299.1 and 299.8] 310.0-310.9 |
| Psychotic Disorders                                                                                                                             | 290.0-295.9, 296.24, 296.34, 297.0-298.0, 298.3-299.9 [except 299.0-299.1 and 299.8], 310.0-310.9                                                                                                                                                          |
| <i>Narrow Diagnostic Groups</i>                                                                                                                 |                                                                                                                                                                                                                                                            |
| Schizophrenia and related disorders                                                                                                             | 295.00-295.99, 297.00-298.09 [except 298.0], 298.30-298.99                                                                                                                                                                                                 |
| Bipolar disorder                                                                                                                                | 296.00-296.06, 296.10-296.16, 296.40-296.46, 296.50-296.56, 296.60-296.66, 296.80, 296.81, 296.89, 296.7                                                                                                                                                   |
| Depression                                                                                                                                      | 296.2, 296.3, 311, 300.4, 298.0                                                                                                                                                                                                                            |
| Anxiety Disorders                                                                                                                               | See broad diagnostic group definition                                                                                                                                                                                                                      |
| Developmental disorders or mental retardation                                                                                                   | 299.0-299.1, 299.8, 317-319                                                                                                                                                                                                                                |
| Disruptive behavior disorders                                                                                                                   | 309.3, 312.0-312.4, 312.8-312.9, 313.81, 314                                                                                                                                                                                                               |
| Other mental disorders                                                                                                                          | 290-319 not included in other narrow diagnostic groups                                                                                                                                                                                                     |
| Broad diagnostic groups define diagnostic categories used in Table 4 and narrow diagnostic groups define diagnostic categories used in Table 5. |                                                                                                                                                                                                                                                            |
